# Supplementary material
Source: MDPI journal article supplement (https://www.mdpi.com/2073-4433/14/4/734)
Supplement: s1 [file s1]

## Supplementary Materials:

Salvador Reynoso-Cruces, Javier Miranda-Martín-del-Campo \* and Juan Carlos Pineda-Santamaría

\* Correspondence: author. Email: miranda@fisica.unam.mx, phone +52-55-56225073. ORCID 0000-0003-4745-3050

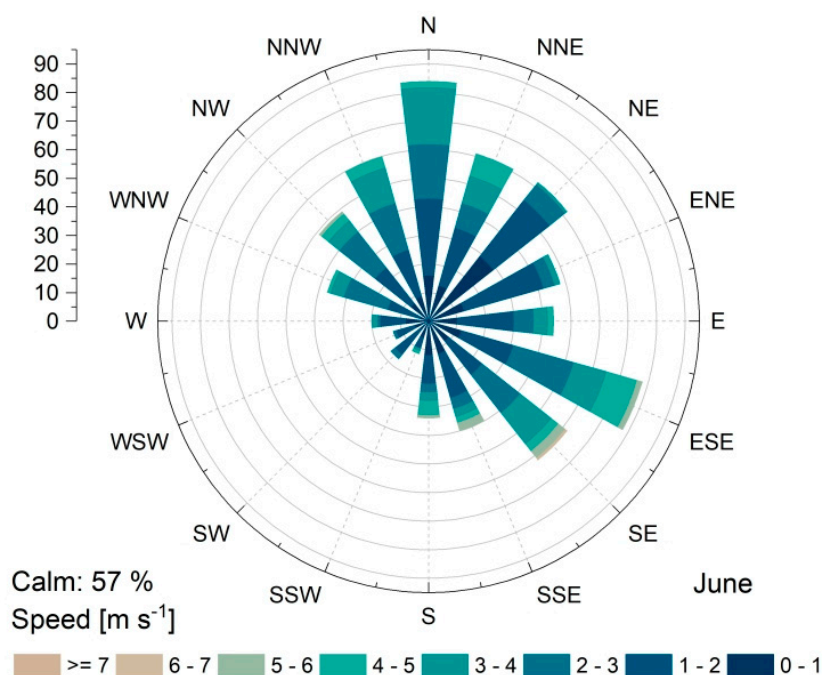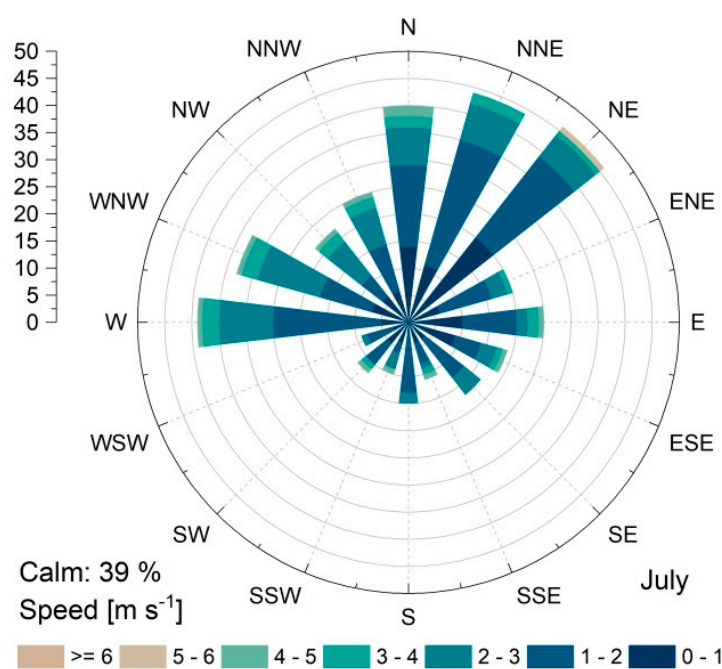

**Figure S1.** Wind rose for Iztapalapa during the sampling period.

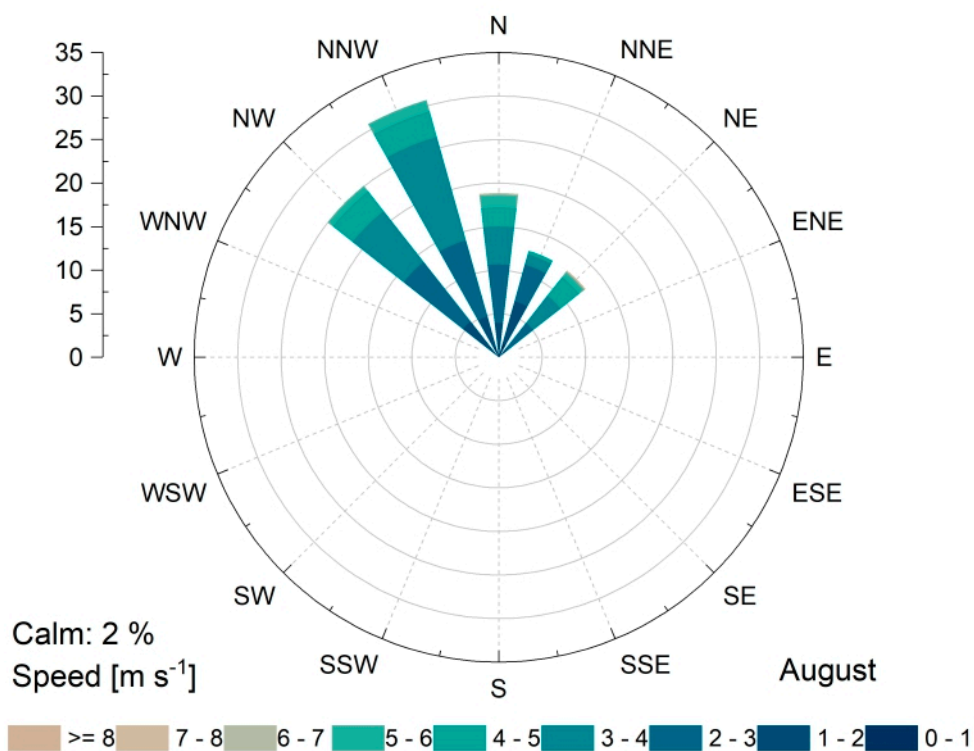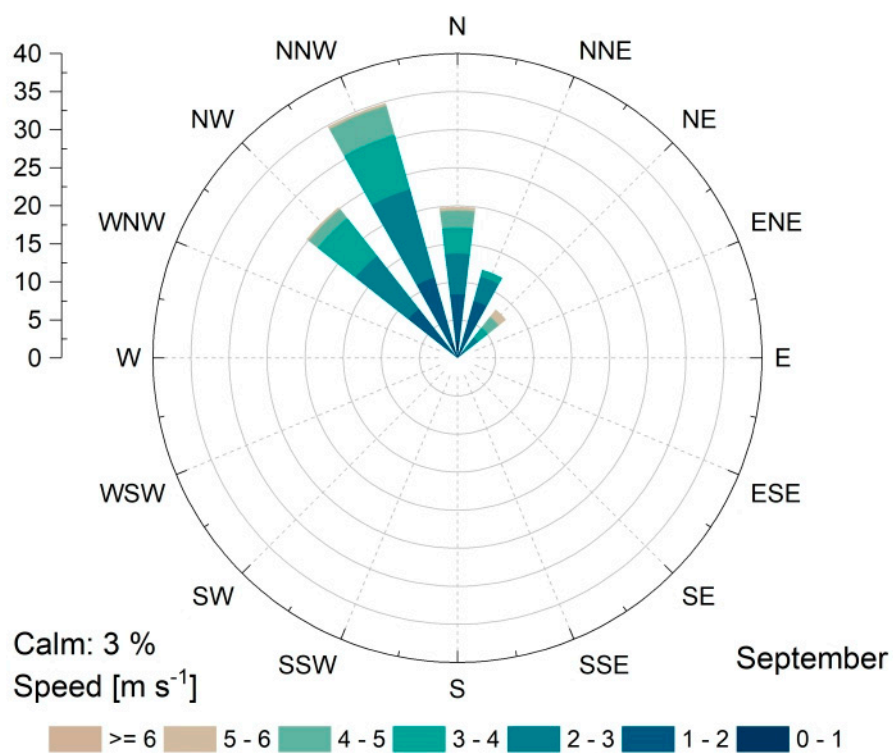

Figure S2. . Wind rose for Tlalnepantla during the sampling period.
